# Supplementary material
Source: Springer Nature journal article supplement (https://www.springermedizin.de/resource/supplementary/12985_2014_2449_MOESM1_ESM.pdf/9606770)

**A**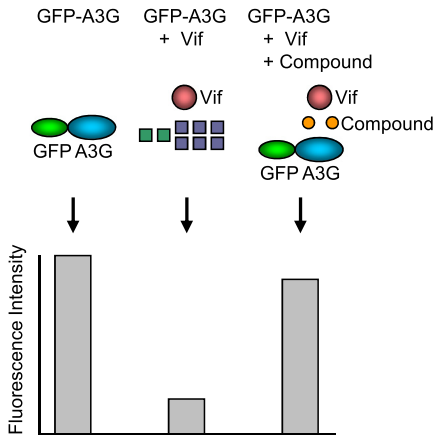**C**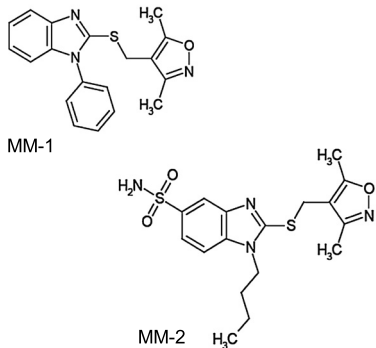**B**

| Small molecule |      | Virus outgrowth |        |
|----------------|------|-----------------|--------|
| Plate          | Well | CEM             | CEM-SS |
| 2              | 5E   | Yes             | Yes    |
| 45             | 2C   | Yes             | Yes    |
| 78             | 3E   | Yes             | Yes    |
| 93             | 2D   | Yes             | Yes    |
| 104            | 4B   | Yes             | Yes    |
| 143            | 9H   | Yes             | Yes    |
| 222            | 3E   | No              | Yes    |
| 223            | 10H  | No              | Yes    |
| 231            | 6F   | Yes             | Yes    |
| 246            | 9A   | Yes             | Yes    |

**D**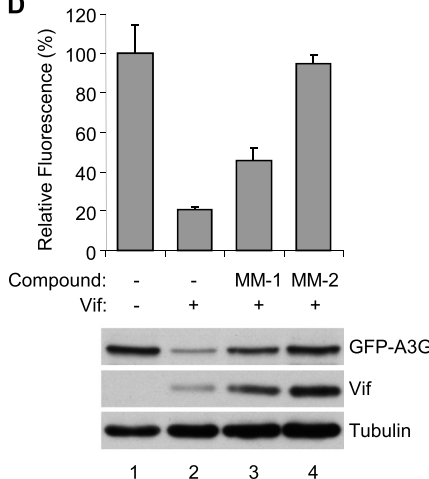

Supplement: MOESM1 [file 9606770]
